# Supplementary material for: Anti-carcinogenic effects of non-polar components containing licochalcone A in roasted licorice root
Source: PubMed Central journal article supplement — Nutr Res Pract. 2014 May 15;8(3):257–66. doi: 10.4162/nrp.2014.8.3.257 (PMC4058558; doi:10.4162/nrp.2014.8.3.257), 2014-05-15
Supplement: nrp-8-257-s001.pdf [file nrp-8-257-s001.pdf]

Supplemental data 1. The structure of compound 1

Element analysis: C 74.6%, H 6.5%; FTIR (KBr,  $\text{cm}^{-1}$ ) 3437, 2965, 2925, 1637, 1603, 1560, 1444, 1342, 1288, 1213, 1163  $\text{cm}^{-1}$ ; UV  $\lambda_{\text{max}}$  (nm) 378, 305, 262 ( $\text{CH}_3\text{OH}$ ): 451, 348, 251 ( $\text{CH}_3\text{ONa}$ ): 379, 313, 315 ( $\text{NaOAc}$ ): 386, 310, 253; MS  $m/z$ : 339 ( $[\text{M}+\text{H}]^+$ ), 297, 283, 191, 121, 107;  $^1\text{H}$  NMR (400 MHz,  $\text{CDCl}_3$ ),  $\delta$ (ppm): 6.59 (H-3), 9.52 (OH, H-4), 7.56 (H-6), 7.64 (H- $\alpha$ ), 8.02 (H- $\beta$ ), 7.97 (H-2'), 6.93 (H-3'), 9.52 (H-4', OH), 6.93 (H-5'), 7.97 (H-6'), 6.27 (H-2''), 5.12, 5.07 (H-3''), 1.45 (H-4''), 1.45 (H-5''), 3.85 ( $\text{OCH}_3$ );  $^{13}\text{C}$  NMR (100 MHz,  $\text{CDCl}_3$ ),  $\delta$  (ppm): 115.8 (C-1), 159.7 (C-2), 101.0 (C-3), 160.0 (C-4), 126.8 (C-5), 129.3 (C-6), 119.4 (C- $\alpha$ ), 140.0 (C- $\beta$ ), 131.5 (C-1'), 131.7 (C-2'), 116.0 (C-3'), 162.3 (C-4'), 116.0 (C-5'), 131.7 (C-6'), 40.6 (C-1''), 148.6 (C-2''), 110.8 (C-3''), 27.4 (C-4''), 27.4 (C-5''), 55.9 ( $\text{OCH}_3$ ), 188.5 (C=O).
